# Supplementary material
Source: HighWire-hosted journal article supplement (http://jneurosci.org/highwire/filestream/600100/field_highwire_adjunct_files/0/Supplemental_Figure.pdf)
Supplement: Supplemental_Figure.pdf [file Supplemental_Figure.pdf]

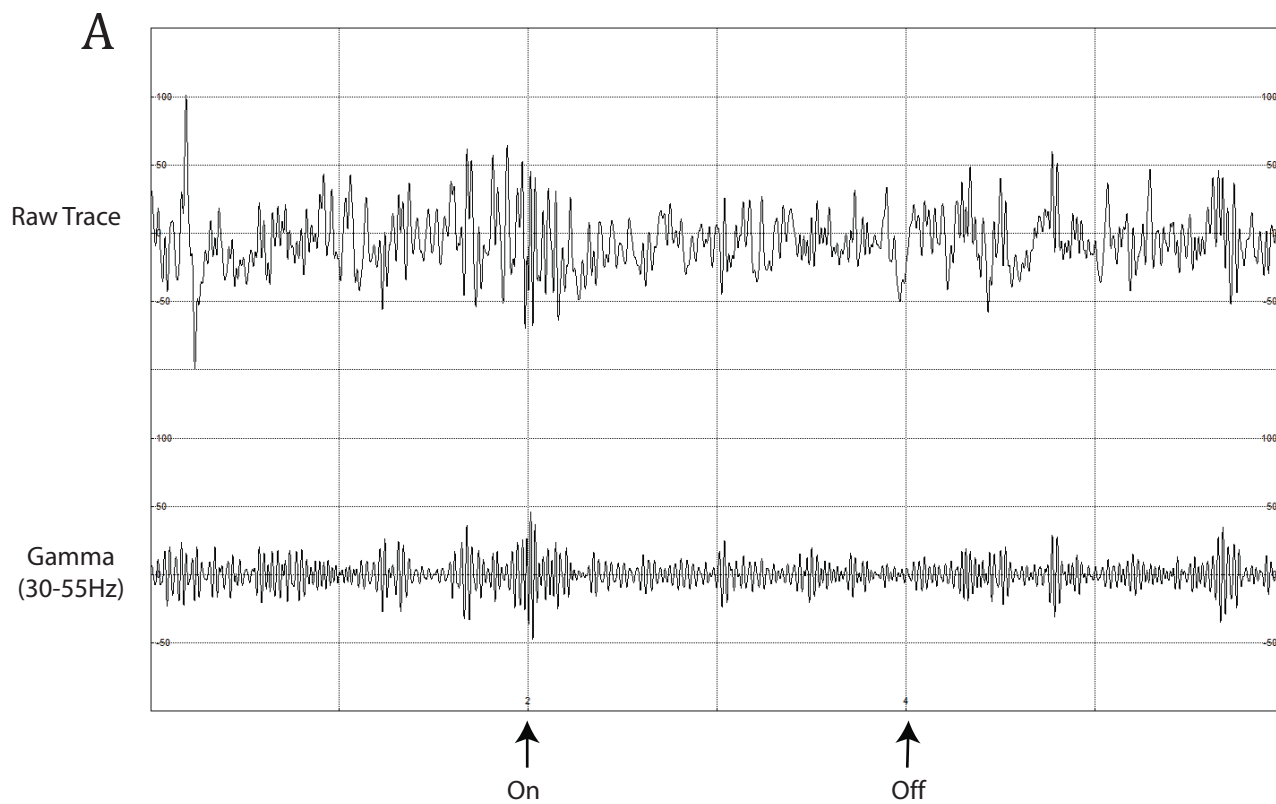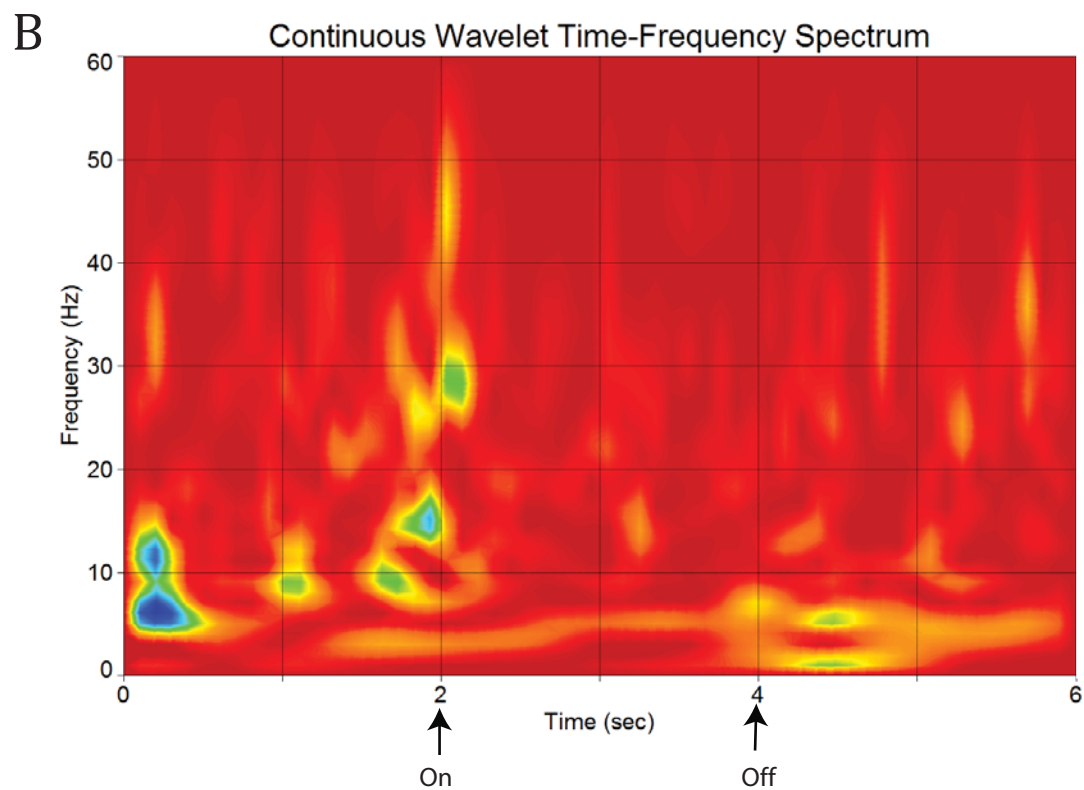

**Figure S1:** Representative tone -evoked local field potential response. The raw trace and associated gamma signal are depicted in A. The power spectrum for this signal is presented in B and demonstrates the evoked gamma response which is time locked to the onset of the auditory stimulus (depicted by arrows).
